# Supplementary material for: High prevalence of mutations affecting the splicing process in a Spanish cohort with autosomal dominant retinitis pigmentosa
Source: PubMed Central journal article supplement (PMC5206707; doi:10.1038/srep39652), 2017-01-03
Supplement: srep39652-s1.pdf [file srep39652-s1.pdf]

## Supplementary Information

### **High prevalence of mutations affecting the splicing process in a Spanish cohort with autosomal dominant retinitis pigmentosa**

Maitane Ezquerro-Inchausti <sup>1¶</sup>, Olatz Barandika<sup>1¶</sup>, Ander Anasagasti<sup>1</sup>, Cristina Irigoyen<sup>1,2</sup>, Adolfo López de Munain<sup>1,3,4,5</sup>, Javier Ruiz-Ederra<sup>1\*</sup>.

<sup>1</sup> Division of Neurosciences, Biodonostia Health Research Institute, San Sebastián, Spain;

<sup>2</sup>Department of Ophthalmology, Donostia University Hospital, San Sebastián, Spain;

<sup>3</sup>Department of Neurology, Donostia University Hospital, San Sebastián, Spain; <sup>4</sup>CIBERNED, Center for Networked Biomedical Research on Neurodegenerative Diseases, Institute of Health Carlos III, Ministry of Economy and Competitiveness, Spain; <sup>5</sup>Department of Neurosciences, University of the Basque Country UPV-EHU, Spain.

¶ These authors contributed equally to this work

\* Correspondence: Javier Ruiz Ederra: Javier Ruiz-Ederra, PhD, Department of Neurosciences, Biodonostia Health Research Institute, Paseo Dr. Begiristain s/n, E-20014-San Sebastián, SPAIN.  
Email: [javiruizederra@yahoo.es](mailto:javiruizederra@yahoo.es)/[javier.ruizederra@osakidetza.eus](mailto:javier.ruizederra@osakidetza.eus). Phone: (+34) 943-006128;  
Fax: (+34) 943006250

## Supplementary Figure S1

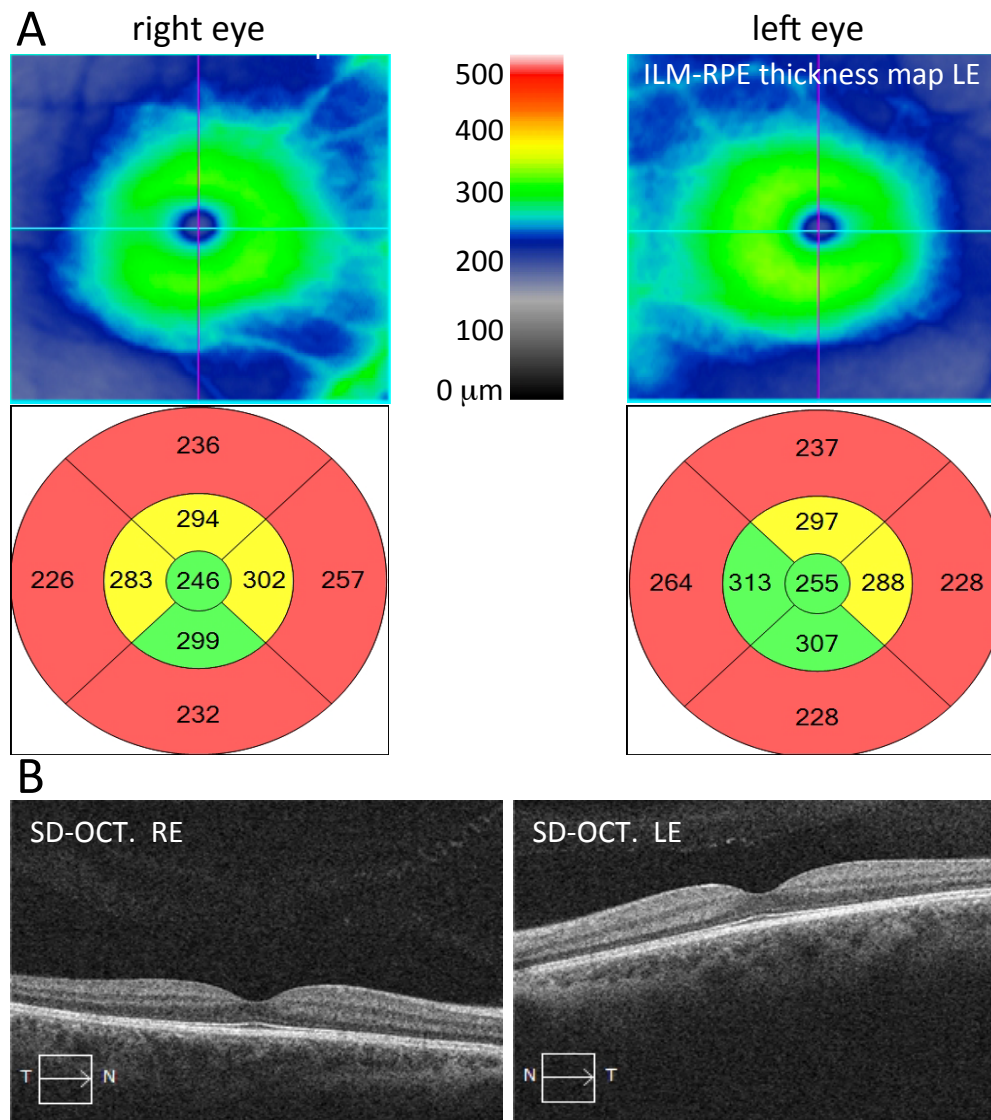

**Supplementary Figure S1. Optical coherence tomography (OCT).** The c.937-1G>T mutation in RHO was found in a 21 year-old patient (indicated by an arrowhead in family tree in Figure 2C). , prior to clinical diagnosis. Visual fields, funduscopy and autofluorescence were normal. On OCT we can see what could be an early sign of RP: the thinning of the macula at the 6mm ring (red colour) (**A**). No disruption of the external limiting membrane or the photoreceptor layer was observed. No macular oedema or epiretinal membrane were seen in the OCT (**B**). Abbreviations: ILM-RPE: inner limiting membrane-retinal pigment epithelium; LE: left eye; RE: right eye; SD-OCT: spectral domain optical coherence tomography.

Supplementary Figure S2

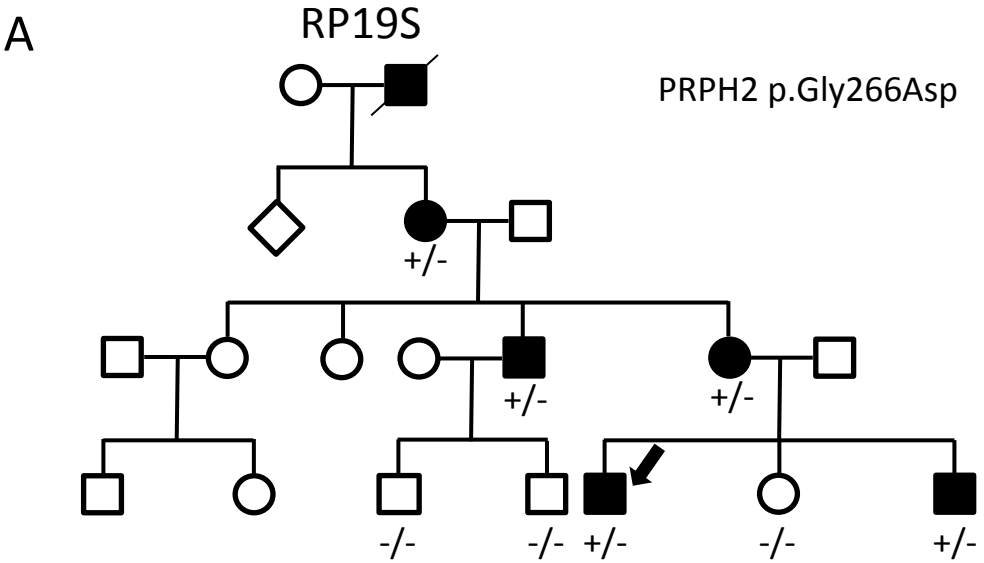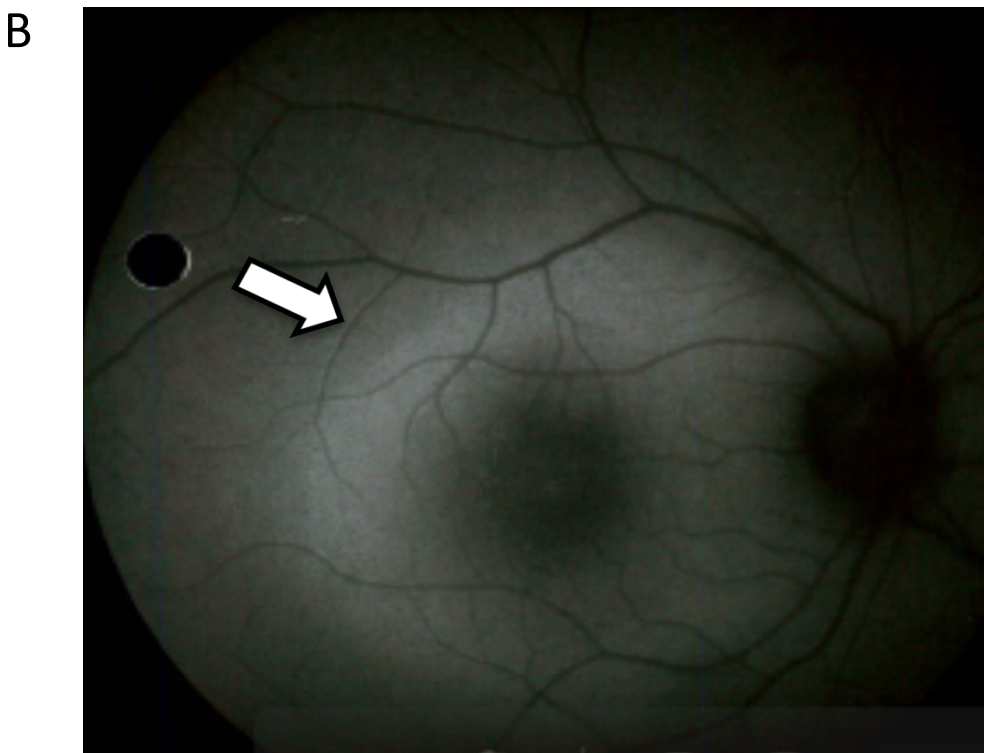

**Supplementary Figure S2. Autofluorescence retinography and family tree for proband RP19S.** Family tree. Genotypes are annotated as +/- (heterozygote); or -/- (wild type). Arrow indicate proband (A). Autofluorescence examination of the eye fundus shows a hyperautofluorescent ring in the macula (open arrow) (B).

Supplementary Figure S3

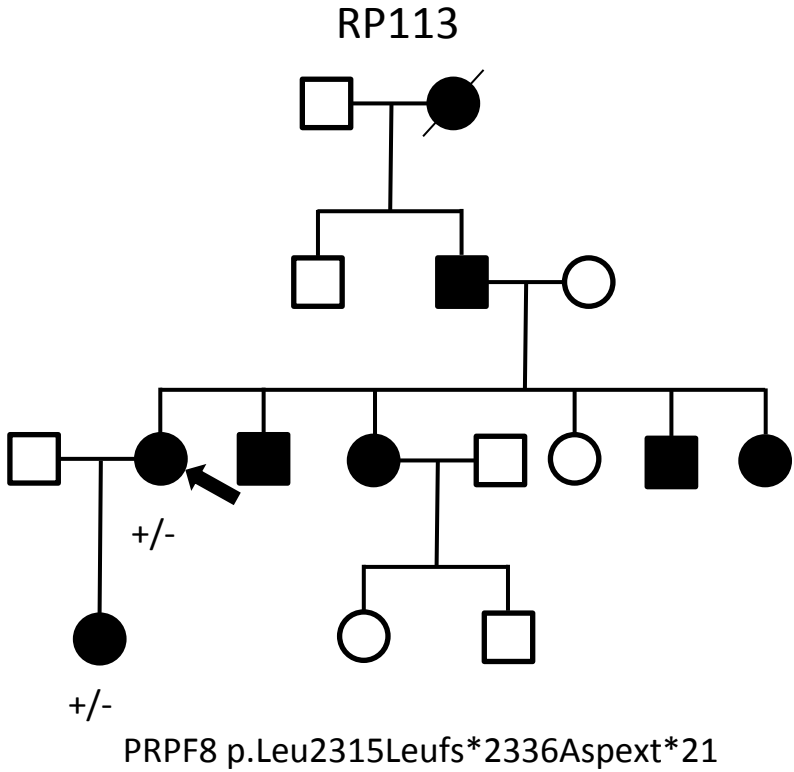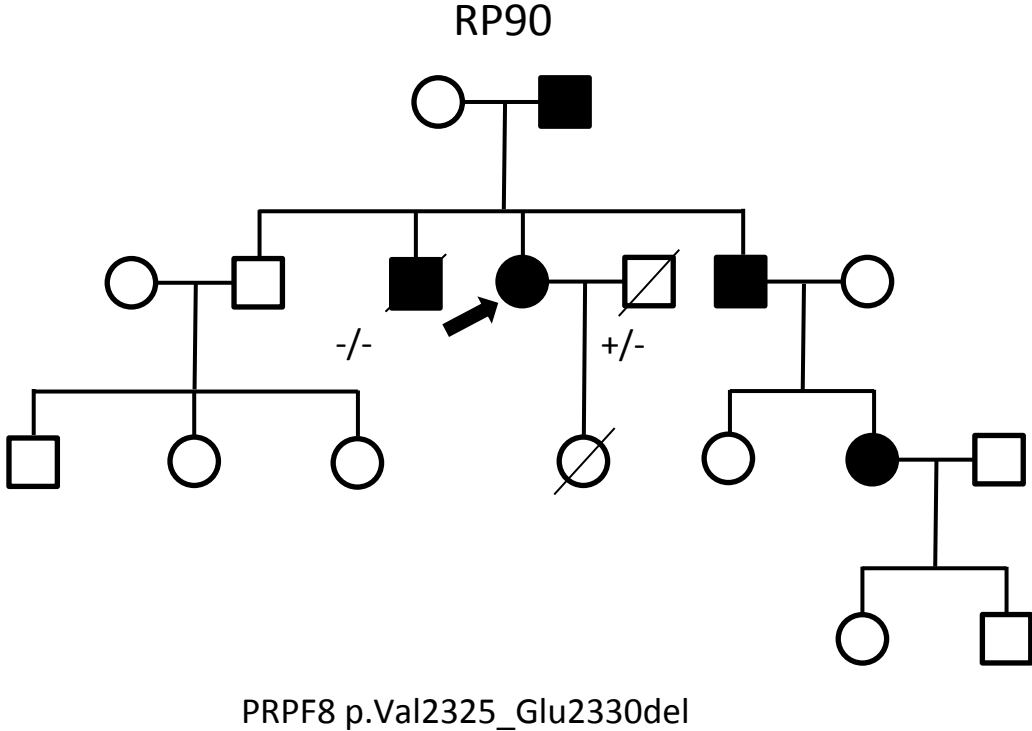

Supplementary Figure S3 (continued)

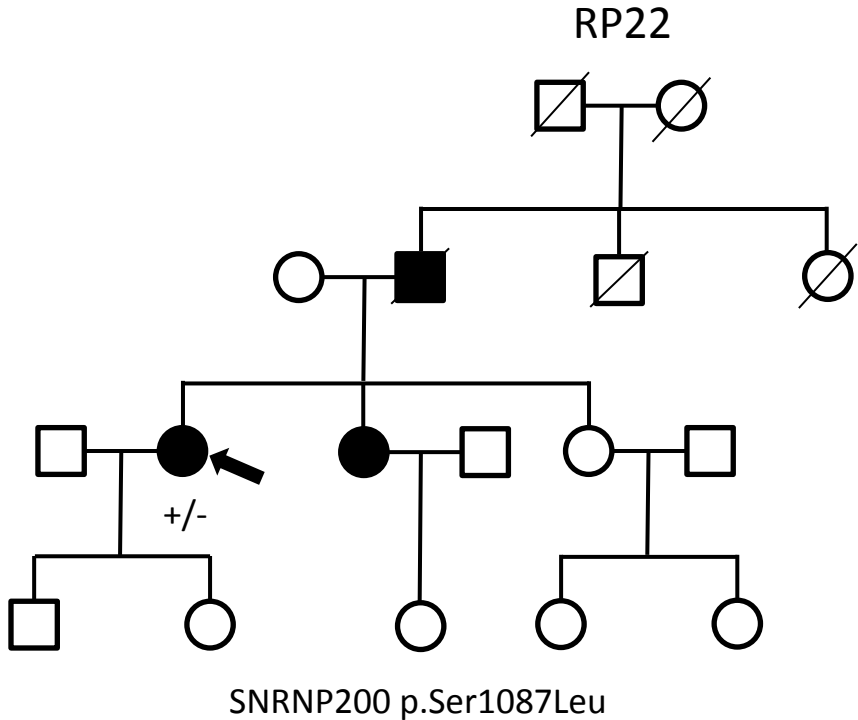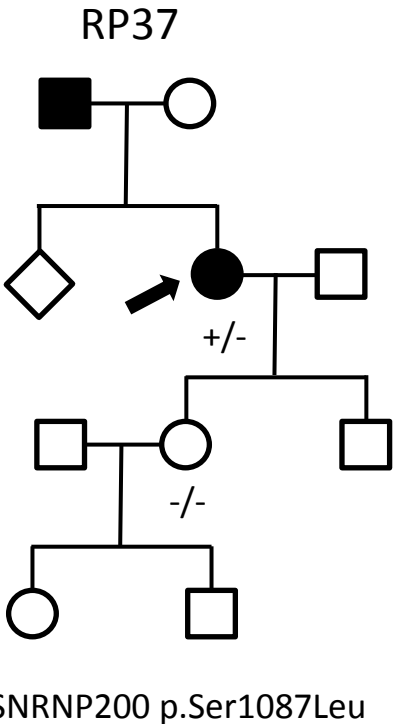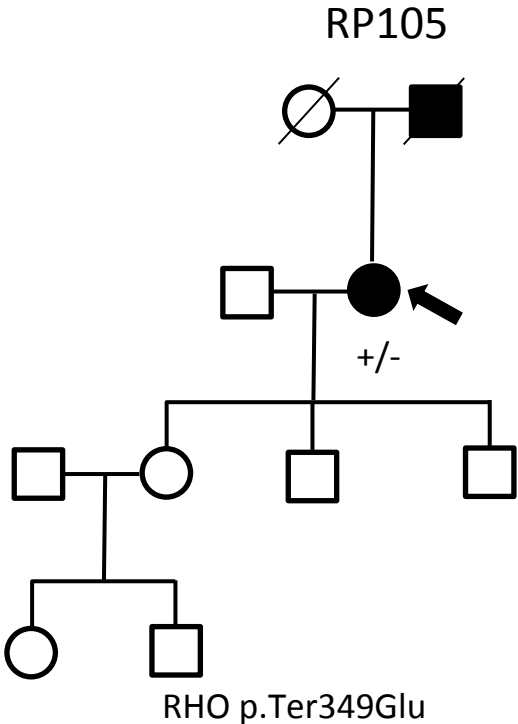

Supplementary Figure S3 (continued)

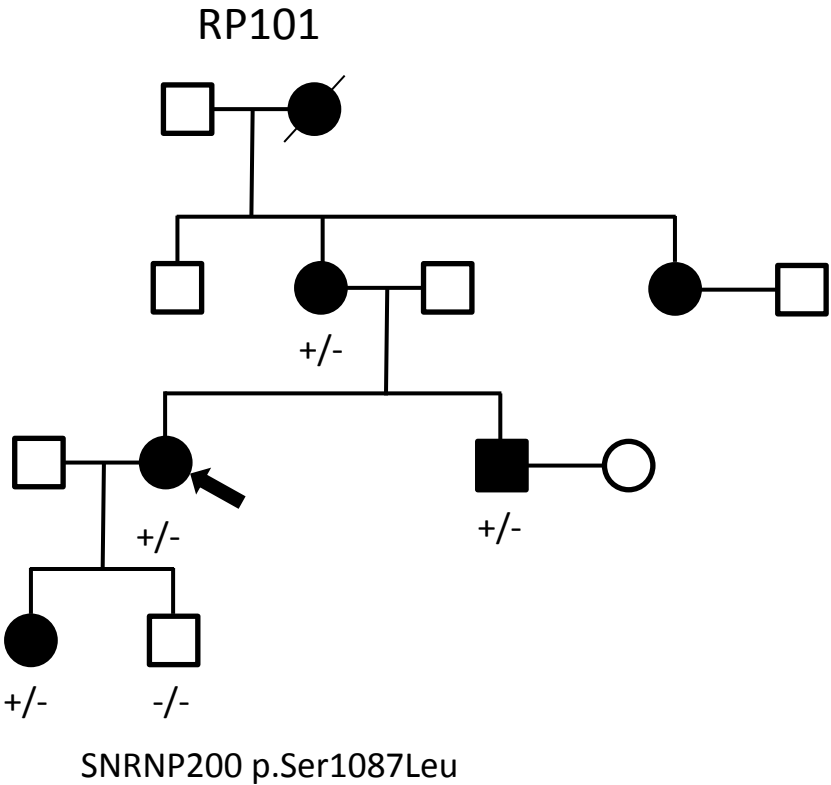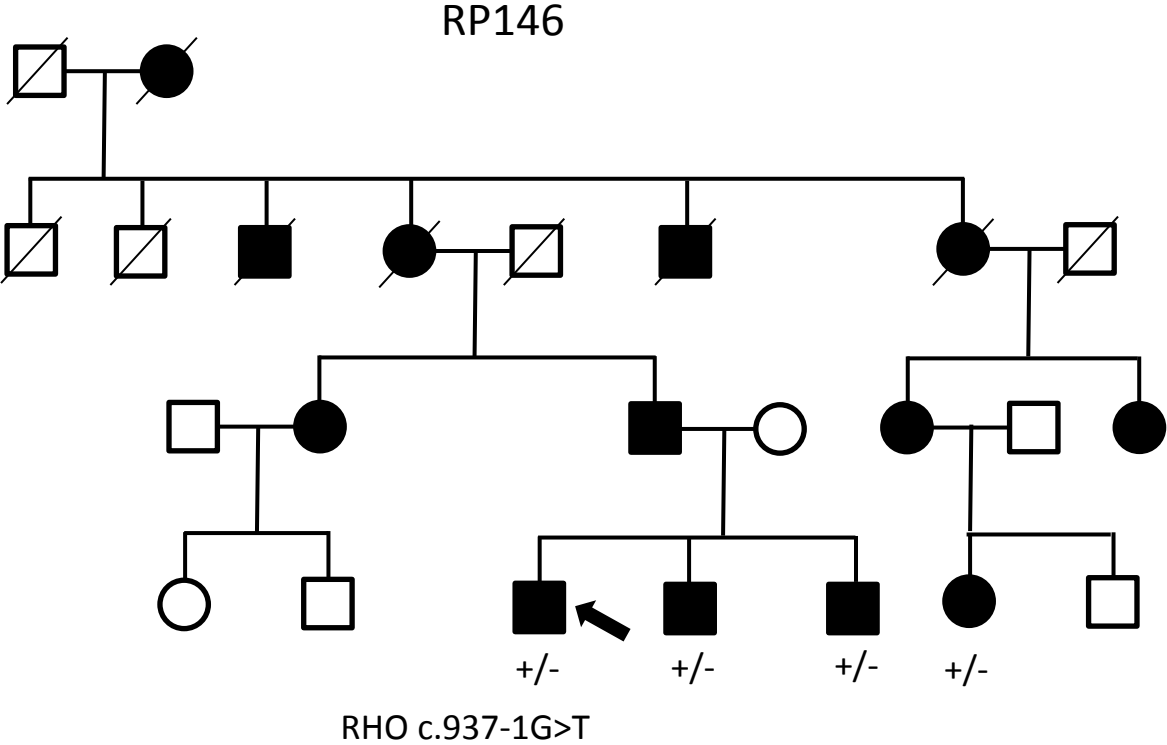

Supplementary Figure S3 (continued)

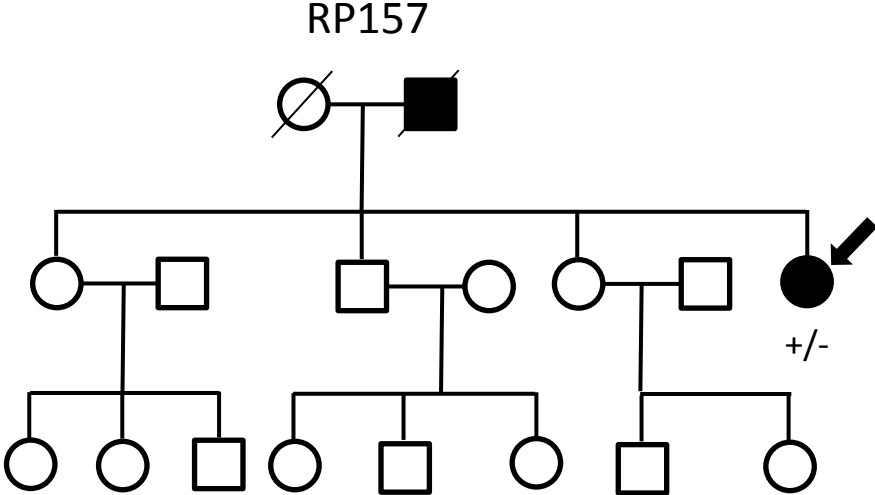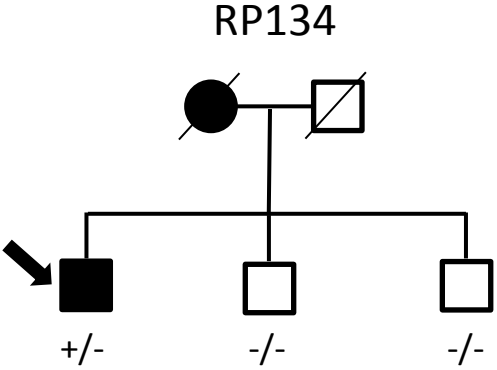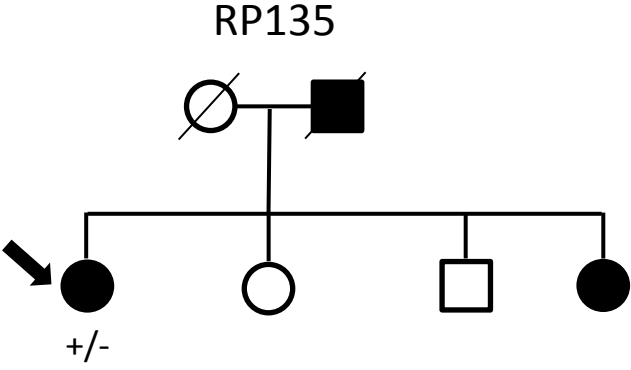

Supplementary Figure S3 (continued)

RP16

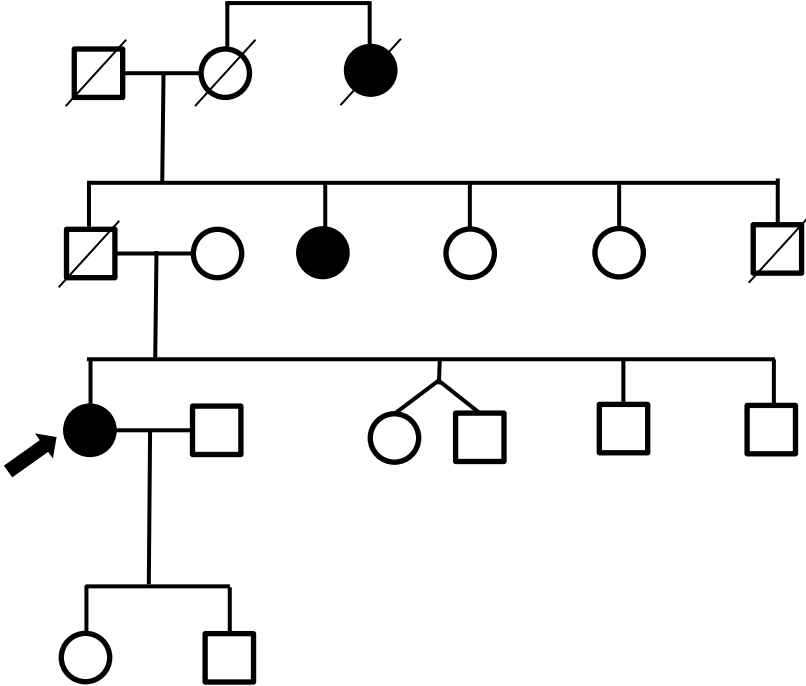

RP20

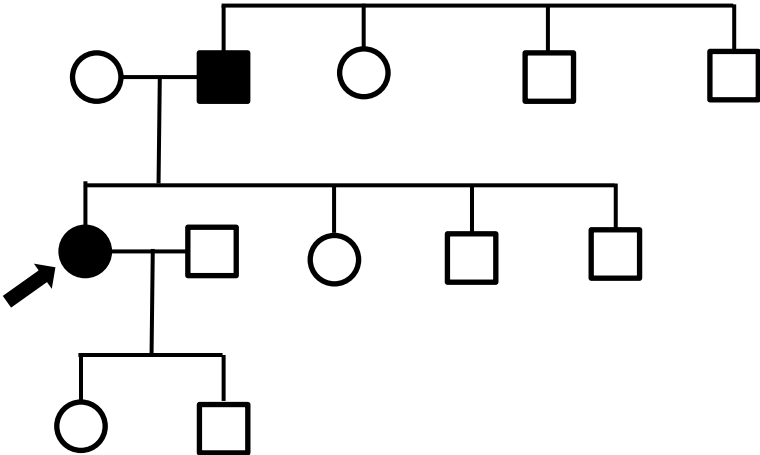



Supplementary Figure S3 (continued)

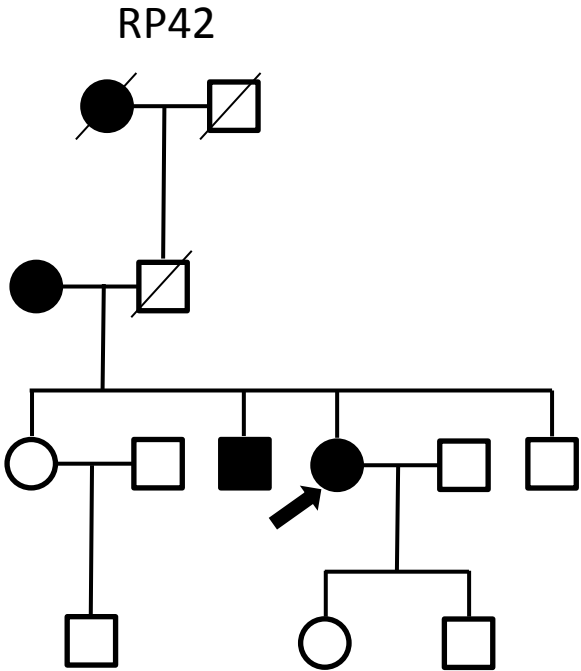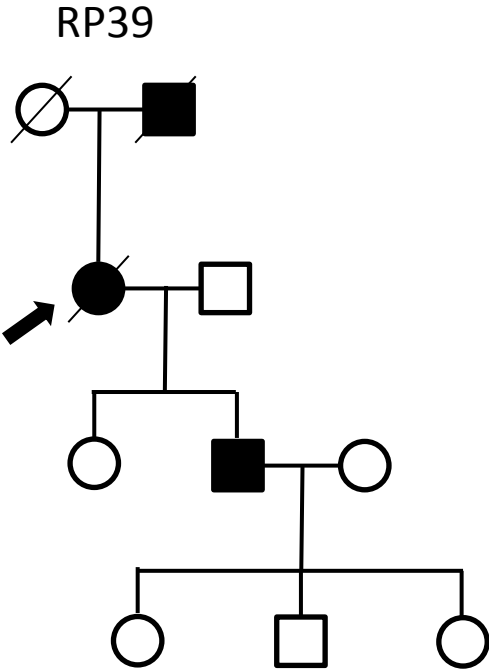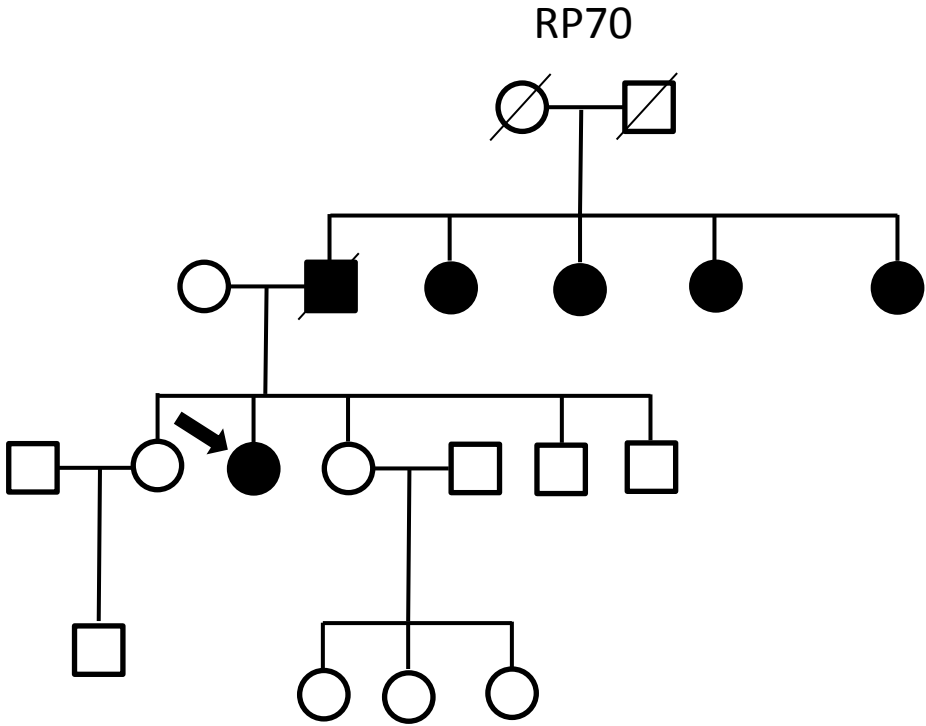

Supplementary Figure S3 (continued)

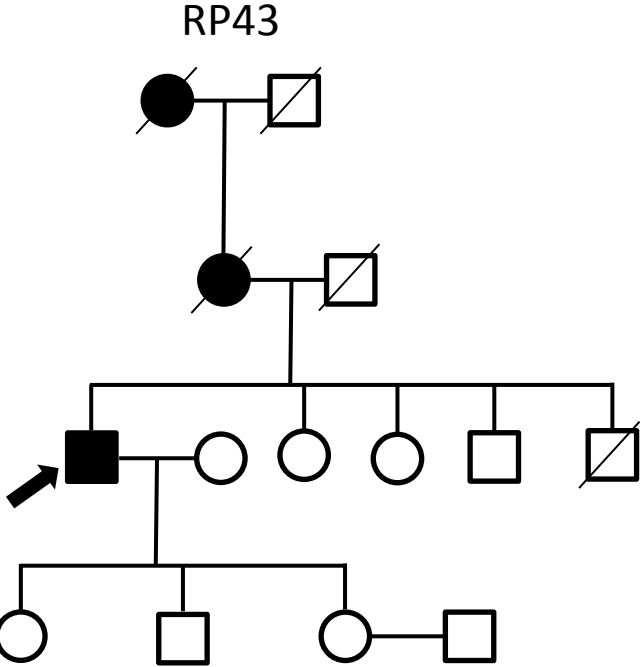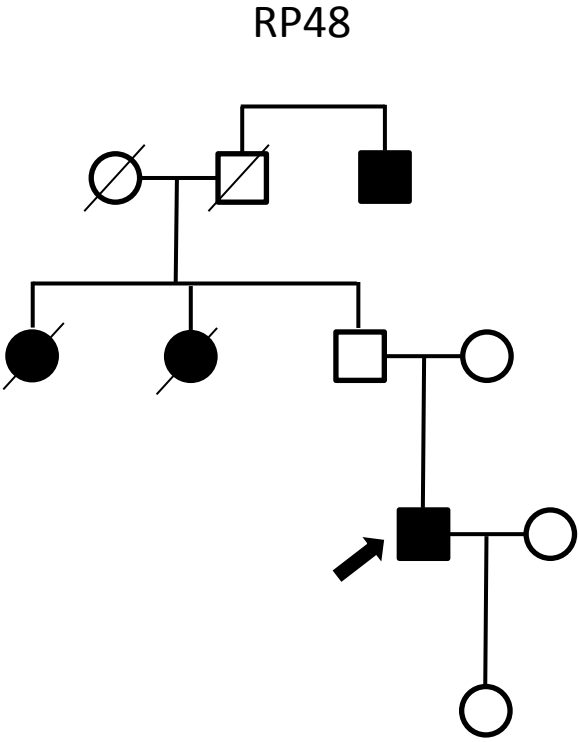

Supplementary Figure S3 (continued)

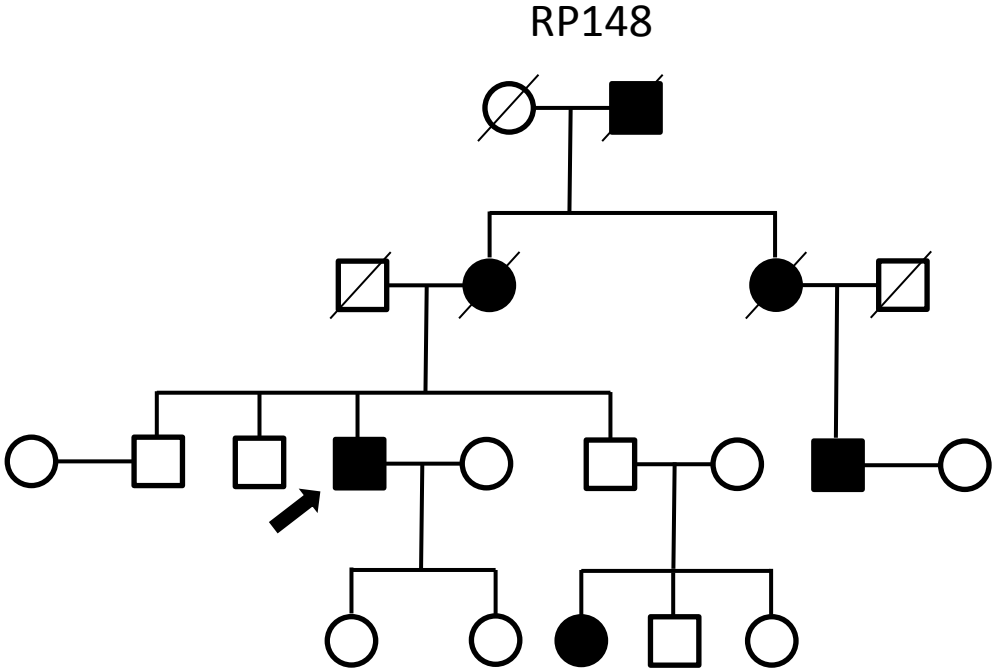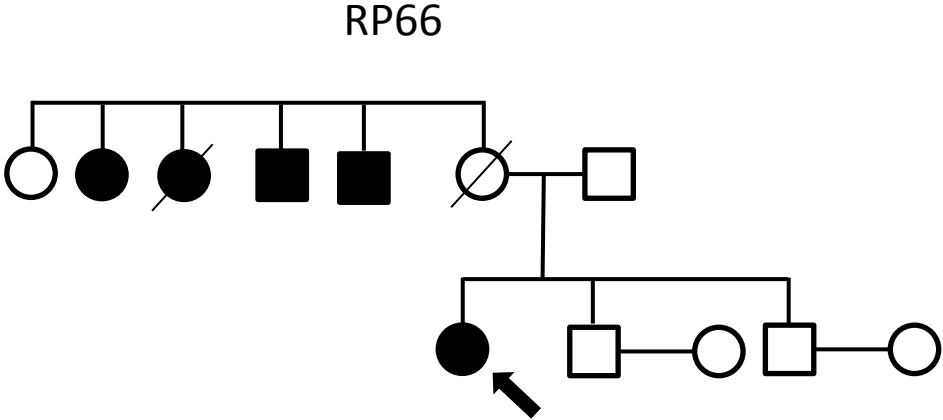

Supplementary Figure S3 (continued)

RP69

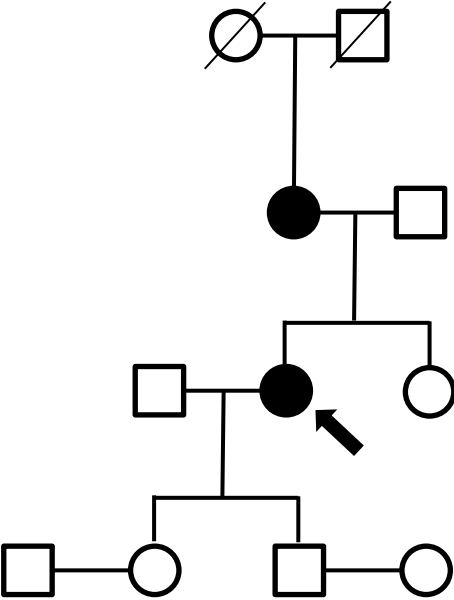

RP79

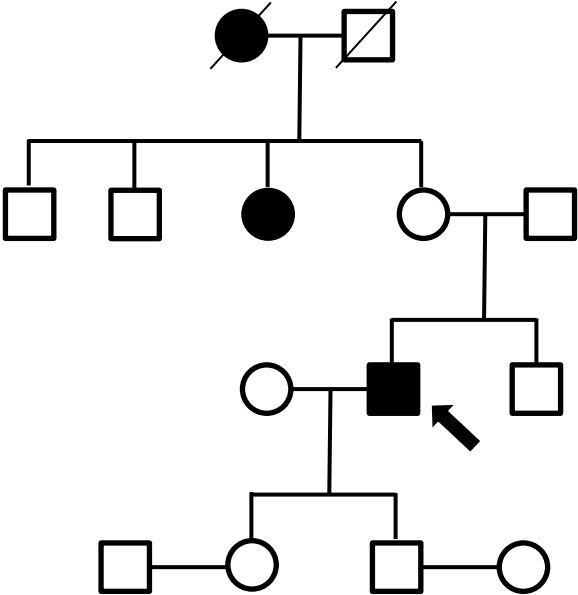

RP80

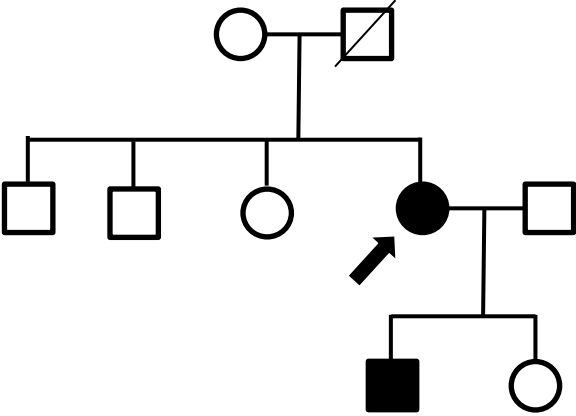

RP85

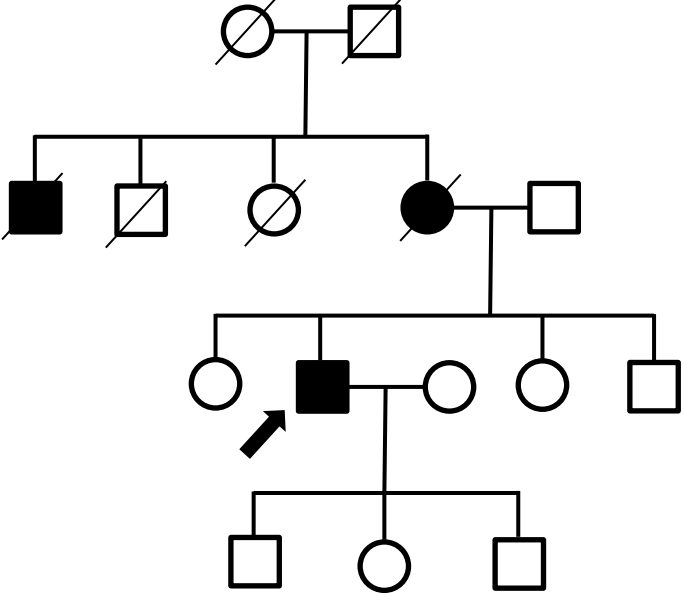

Supplementary Figure S3 (continued)

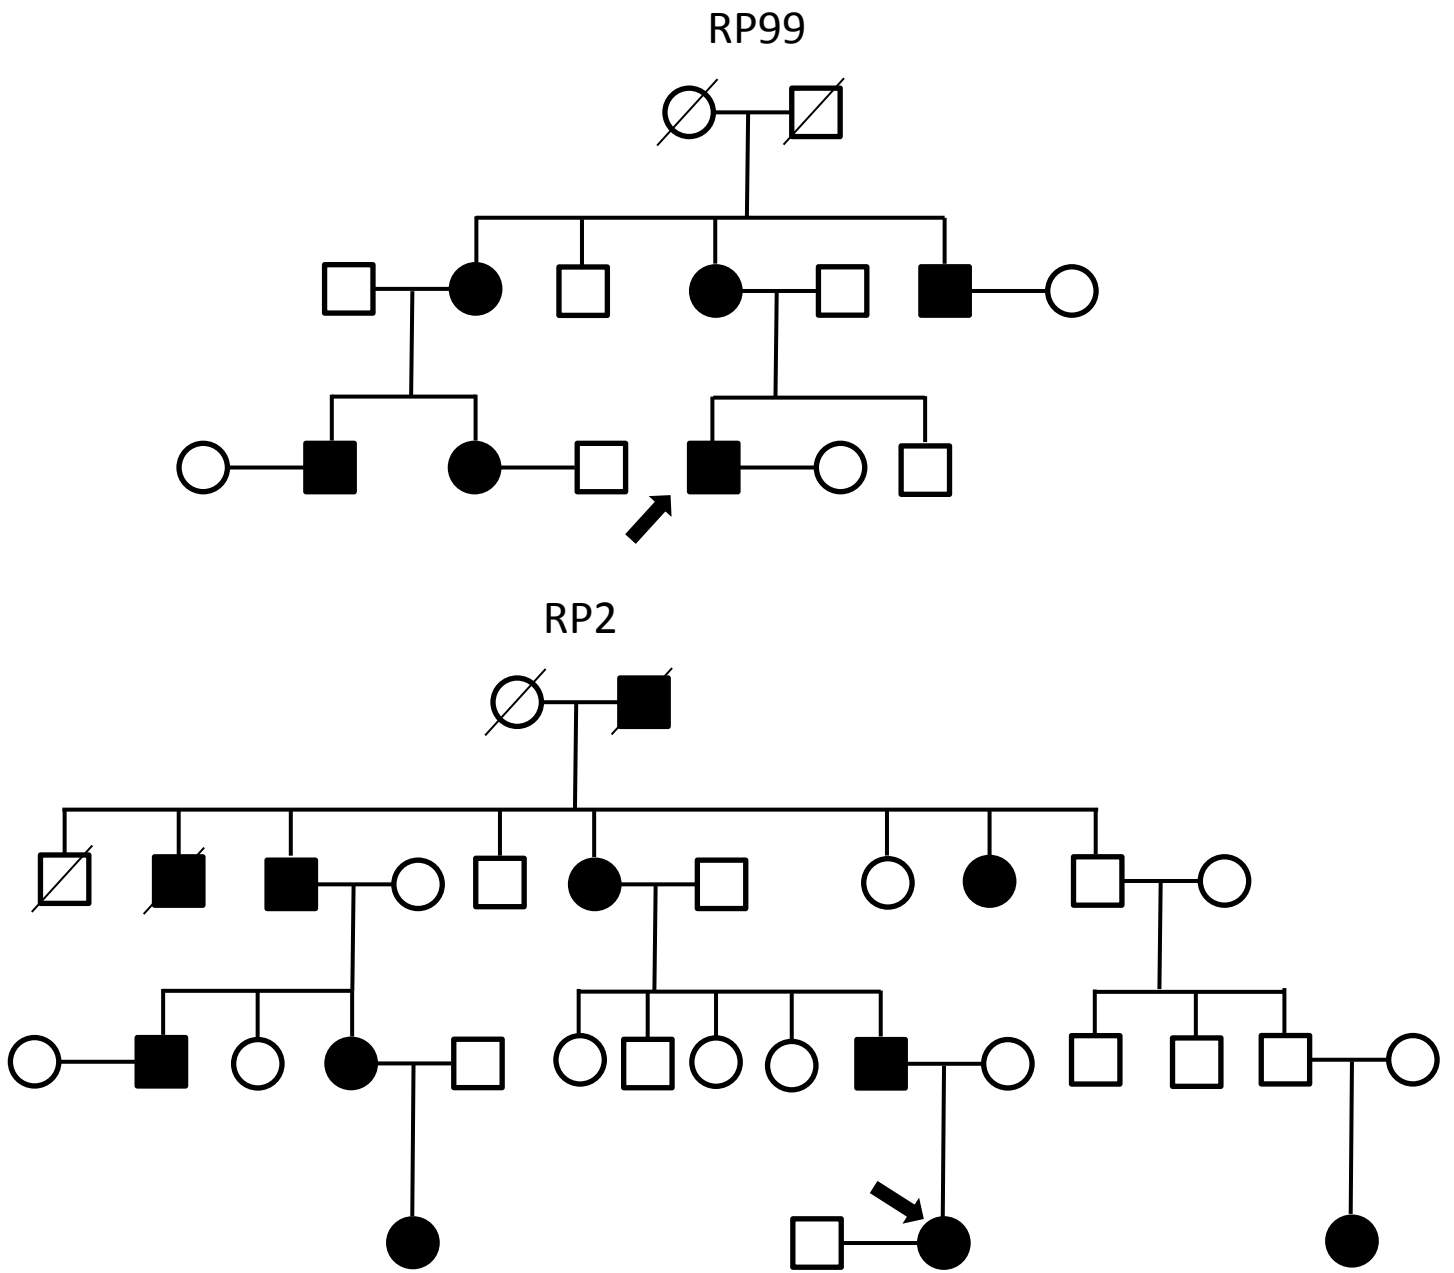

**Supplementary Figure S3. Family trees for all probands recruited in the study, excluding those described in Figure 2 and Sup. Fig. 1. Genotypes of those cases diagnosed are annotated as +/- (heterozygote); or -/- (wild type). Arrow indicate proband.**

## Supplementary Figure S4

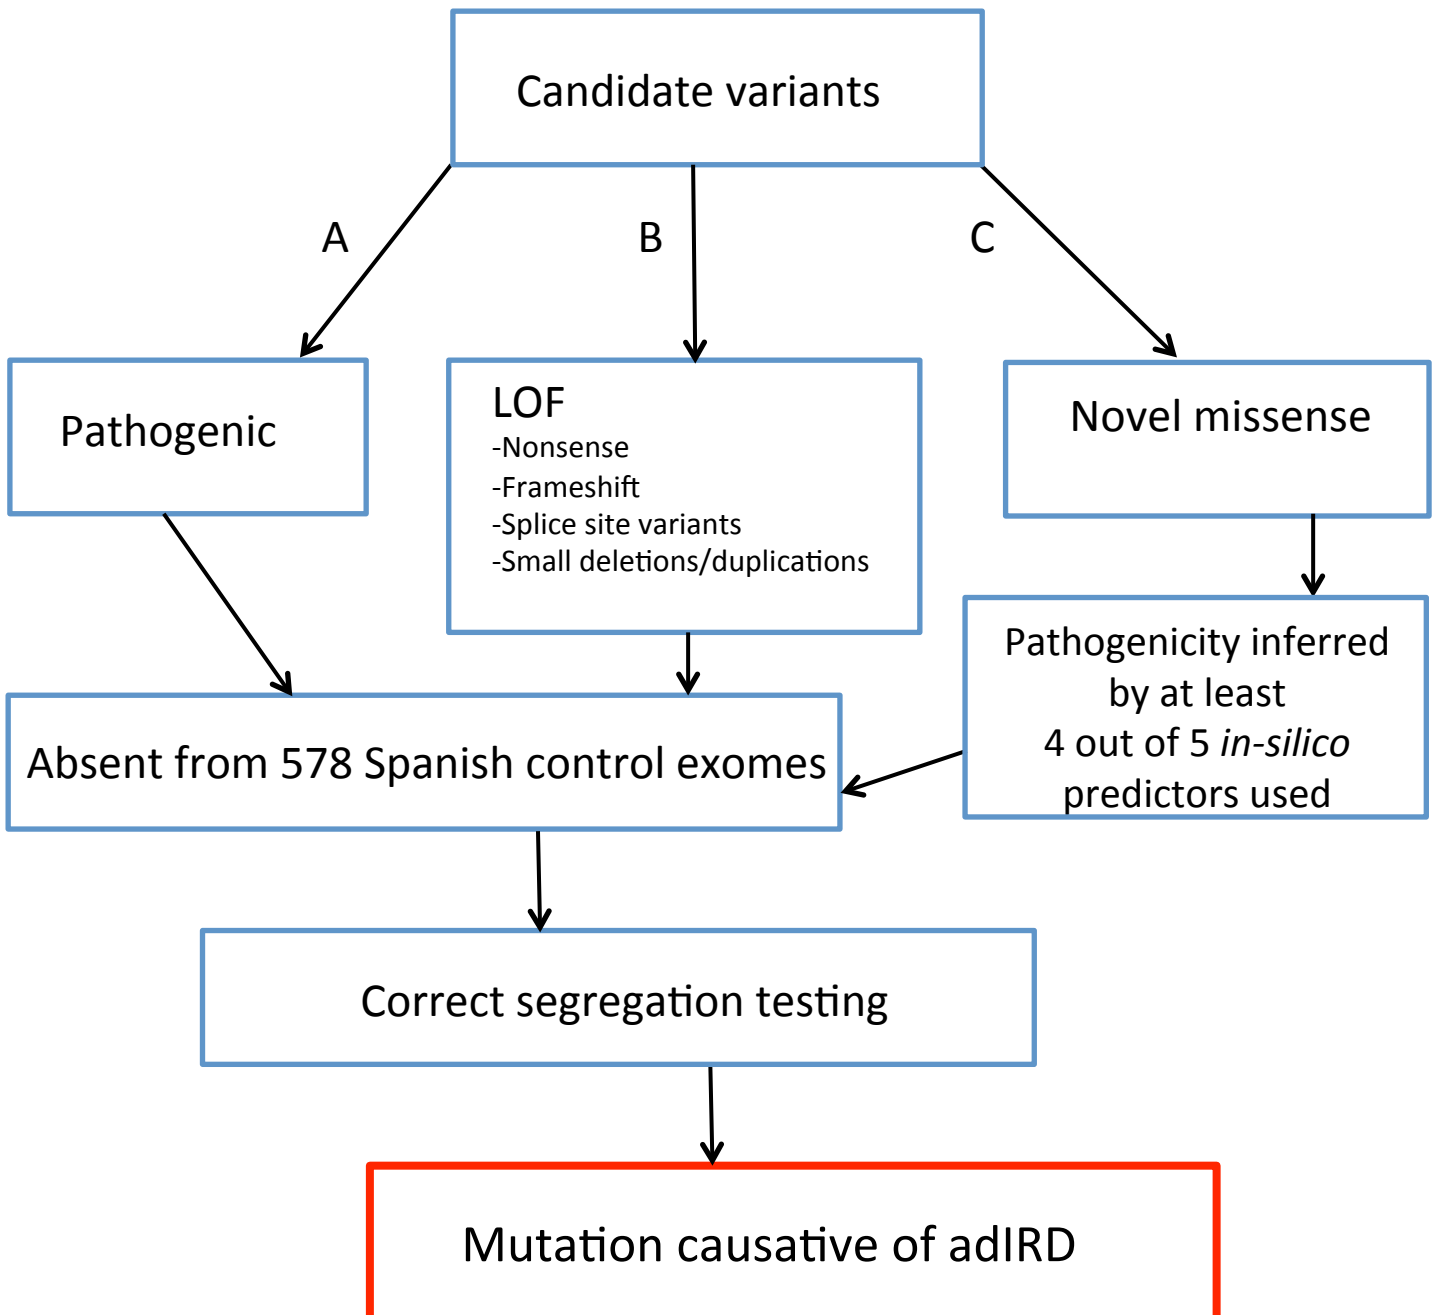

**Supplementary Figure S4.** Schematic representation of the criteria used to select mutations responsible for autosomal dominant inherited retinal dystrophies. adIRD: Autosomal dominant inherited retinal dystrophies. LOF: loss of function.

# Supplementary Table S1

**A**

| PATIENT | NUMBER OF VARIANTS PER PATIENT | DISCARDED VARIANTS |         |     |                              | SELECTED VARIANTS |                               |                   |                     |                 |          |                 |
|---------|--------------------------------|--------------------|---------|-----|------------------------------|-------------------|-------------------------------|-------------------|---------------------|-----------------|----------|-----------------|
|         |                                | INTRONIC           | SYNONIM | UTR | LOW PATHOGENICITY PREDICTION | PATHOGENIC        | HIGH PATHOGENICITY PREDICTION | SPLICING VARIANTS | FRAMESHIFT VARIANTS | STOP CODON LOSS | DELETION | STOP CODON GAIN |
| 5       | 40                             | 21                 | 12      | 1   | 5                            |                   |                               |                   |                     |                 |          | 1               |
| 9       | 49                             | 24                 | 13      | 4   | 7                            |                   |                               | 1                 |                     |                 |          |                 |
| 71      | 42                             | 20                 | 12      | 2   | 6                            |                   | 1                             |                   | 1                   |                 |          |                 |
| 98      | 51                             | 24                 | 17      | 3   | 7                            |                   |                               |                   |                     |                 |          |                 |
| 2       | 48                             | 18                 | 15      | 7   | 8                            |                   |                               |                   |                     |                 |          |                 |
| 16      | 44                             | 16                 | 14      | 2   | 10                           |                   |                               |                   | 2                   |                 |          |                 |
| 19S     | 48                             | 23                 | 14      | 4   | 6                            |                   | 1                             |                   |                     |                 |          |                 |
| 20      | 50                             | 18                 | 18      | 3   | 10                           |                   |                               |                   | 1                   |                 |          |                 |
| 22      | 38                             | 15                 | 14      | 3   | 5                            | 1                 |                               |                   |                     |                 |          |                 |
| 37      | 45                             | 20                 | 13      | 4   | 6                            | 1                 |                               |                   | 1                   |                 |          |                 |
| 39      | 48                             | 24                 | 15      | 3   | 6                            |                   |                               |                   |                     |                 |          |                 |
| 42      | 47                             | 20                 | 16      | 2   | 7                            |                   | 1                             |                   | 1                   |                 |          |                 |
| 43      | 45                             | 19                 | 15      | 1   | 8                            |                   |                               |                   | 2                   |                 |          |                 |
| 48      | 48                             | 22                 | 14      | 3   | 8                            |                   |                               |                   | 1                   |                 |          |                 |
| 64      | 44                             | 21                 | 11      | 1   | 8                            | 1                 |                               |                   | 2                   |                 |          |                 |
| 66      | 47                             | 20                 | 12      | 3   | 7                            |                   | 1                             |                   | 4                   |                 |          |                 |
| 69      | 50                             | 22                 | 15      | 4   | 7                            |                   | 1                             |                   | 1                   |                 |          |                 |
| 70      | 41                             | 15                 | 13      | 3   | 8                            | 1                 |                               |                   | 1                   |                 |          |                 |
| 79      | 43                             | 16                 | 12      | 5   | 7                            |                   |                               |                   | 3                   |                 |          |                 |
| 80      | 46                             | 18                 | 16      | 3   | 7                            |                   |                               |                   | 2                   |                 |          |                 |
| 85      | 44                             | 19                 | 15      | 3   | 6                            |                   |                               |                   | 1                   |                 |          |                 |
| 90      | 42                             | 15                 | 14      | 3   | 9                            |                   |                               |                   |                     |                 | 1        |                 |
| 99      | 44                             | 20                 | 15      | 2   | 5                            |                   |                               |                   | 2                   |                 |          |                 |
| 101     | 47                             | 23                 | 13      | 4   | 4                            | 1                 |                               |                   | 2                   |                 |          |                 |
| 102     | 45                             | 20                 | 11      | 4   | 5                            | 1                 |                               |                   | 4                   |                 |          |                 |
| 105     | 45                             | 20                 | 16      | 3   | 5                            |                   |                               |                   |                     | 1               |          |                 |
| 113     | 44                             | 19                 | 13      | 3   | 7                            |                   |                               |                   | 2                   |                 |          |                 |
| 133     | 47                             | 17                 | 16      | 4   | 8                            |                   |                               | 1                 | 1                   |                 |          |                 |
| 134     | 46                             | 23                 | 11      | 5   | 6                            | 1                 |                               |                   |                     |                 |          |                 |
| 135     | 41                             | 15                 | 14      | 2   | 9                            |                   | 1                             |                   |                     |                 |          |                 |
| 146     | 49                             | 23                 | 14      | 4   | 6                            |                   |                               | 1                 | 1                   |                 |          |                 |
| 148     | 43                             | 17                 | 19      | 2   | 5                            |                   |                               |                   |                     |                 |          |                 |
| 157     | 49                             | 19                 | 18      | 4   | 6                            | 1                 | 1                             |                   |                     |                 |          |                 |

## Supplementary Table S1 (continued)

**B**

| MUTATION       | PATIENT | GENE     | VARIANT TYPE                  | SANGER SEQUENCED | CONFIRMED | FAMILY SEGREGATION    | CONCLUSION                      |
|----------------|---------|----------|-------------------------------|------------------|-----------|-----------------------|---------------------------------|
| c.1625C>G      | 5       | RP1      | stop codon gain               | yes              | yes       |                       | confirmed control               |
| c.937-1G>T     | 9       | RHO      | splicing variant              | yes              | yes       |                       | confirmed control               |
| c.259C>G       | 71      | RHO      | high pathogenicity prediction | yes              | yes       |                       | confirmed control               |
| c.415delC      | 71      | KLHL7    | frameshift variant            | no               |           |                       | false positive in other patient |
| c.324delA      | 16      | SEMA4A   | frameshift variant            | yes              | no        |                       | false positive                  |
| c.650delG      | 16      | AIPL1    | frameshift variant            | yes              | no        |                       | false positive                  |
| c.797C>T       | 19S     | PRPH2    | high pathogenicity prediction | yes              | yes       | correct               | causative variant               |
| c.415delC      | 20      | KLHL7    | frameshift variant            | yes              | no        |                       | false positive                  |
| c.3260C>T      | 22      | SNRNP200 | pathogenic                    | yes              | yes       | correct               | causative variant               |
| c.3260C>T      | 37      | SNRNP200 | pathogenic                    | yes              | yes       | correct               | causative variant               |
| c.415delC      | 37      | KLHL7    | frameshift variant            | no               |           |                       | false positive*                 |
| c.415delC      | 42      | KLHL7    | frameshift variant            | no               |           |                       | false positive*                 |
| c.4555T>C      | 42      | RIMS1    | high pathogenicity prediction | yes              | yes       | incorrect             | not causative variant           |
| c.1596delT     | 43      | RPE65    | frameshift variant            | no               |           |                       | false positive*                 |
| c.1670delT     | 43      | PROM1    | frameshift variant            | yes              | no        |                       | false positive                  |
| c.650delG      | 48      | AIPL1    | frameshift variant            | no               |           |                       | false positive*                 |
| c.1596delT     | 64      | RPE65    | frameshift variant            | yes              | no        |                       | false positive                  |
| c.1670delT     | 64      | PROM1    | frameshift variant            | no               |           |                       | false positive*                 |
| c.3260C>T      | 64      | SNRNP200 | pathogenic                    | yes              | yes       | incomplete penetrance | causative variant               |
| c.1596delT     | 66      | RPE65    | frameshift variant            | no               |           |                       | false positive*                 |
| c.1670delT     | 66      | PROM1    | frameshift variant            | no               |           |                       | false positive*                 |
| c.2088delT     | 66      | SNRNP200 | frameshift variant            | yes              | no        |                       | false positive                  |
| c.415delC      | 66      | KLHL7    | frameshift variant            | no               |           |                       | false positive*                 |
| c.2044C>T      | 66      | SEMA4A   | high pathogenicity prediction | yes              | yes       | incorrect             | not causative variant           |
| c.2835A>C      | 69      | PRPF8    | high pathogenicity prediction | yes              | yes       | incorrect             | not causative variant           |
| c.324delA      | 69      | SEMA4A   | frameshift variant            | no               |           |                       | false positive*                 |
| c.324delA      | 70      | SEMA4A   | frameshift variant            | no               |           |                       | false positive*                 |
| c.149C>T       | 70      | GUCA1A   | pathogenic                    | yes              | yes       | incorrect             | not causative variant           |
| c.2088delT     | 79      | SNRNP200 | frameshift variant            | no               |           |                       | false positive*                 |
| c.324delA      | 79      | SEMA4A   | frameshift variant            | no               |           |                       | false positive*                 |
| c.650delG      | 79      | AIPL1    | frameshift variant            | no               |           |                       | false positive*                 |
| c.2088delT     | 80      | SNRNP200 | frameshift variant            | no               |           |                       | false positive*                 |
| c.324delA      | 80      | SEMA4A   | frameshift variant            | no               |           |                       | false positive*                 |
| c.324delA      | 85      | SEMA4A   | frameshift variant            | no               |           |                       | false positive*                 |
| c.6974_6994del | 90      | PRPF8    | deletion                      | yes              | yes       | correct               | causative                       |
| c.2088delT     | 99      | SNRNP200 | frameshift variant            | no               |           |                       | false positive*                 |
| c.650delG      | 99      | AIPL1    | frameshift variant            | no               |           |                       | false positive*                 |
| c.1336delA     | 101     | PRPF3    | frameshift variant            | yes              | no        |                       | false positive                  |
| c.1596delT     | 101     | RPE65    | frameshift variant            | no               |           |                       | false positive*                 |



|            |     |          |                               |     |     |                       |                       |
|------------|-----|----------|-------------------------------|-----|-----|-----------------------|-----------------------|
| c.3260C>T  | 101 | SNRNP200 | pathogenic                    | yes | yes | correct               | causative variant     |
| c.1336delA | 102 | PRPF3    | frameshift variant            | no  |     |                       | false positive*       |
| c.1596delT | 102 | RPE65    | frameshift variant            | no  |     |                       | false positive*       |
| c.1670delT | 102 | PROM1    | frameshift variant            | no  |     |                       | false positive*       |
| c.193delA  | 102 | CA4      | frameshift variant            | yes | no  |                       | false positive        |
| c.3260C>T  | 102 | SNRNP200 | Pathogenic                    | yes | yes | incomplete penetrance | causative             |
| c.1045T>C  | 105 | RHO      | codon stop loss               | yes | yes | n/a                   | causative             |
| c.2088delT | 113 | SNRNP200 | frameshift variant            | no  |     |                       | false positive*       |
| c.6945delG | 113 | PRPF8    | frameshift variant            | yes | yes | correct               | causative variant     |
| c.937-1G>T | 133 | RHO      | splicing variant              | yes | yes | correct               | causative variant     |
| c.324delA  | 133 | SEMA4A   | frameshift variant            | no  |     |                       | false positive*       |
| c.3260C>T  | 134 | SNRNP200 | pathogenic                    | yes | yes | correct               | causative             |
| c.568G>A   | 135 | RHO      | high pathogenicity prediction | yes | yes | n/a                   | causative variant     |
| c.666insG  | 146 | RIMS1    | frameshift variant            | yes | no  |                       | false positive        |
| c.937-1G>T | 146 | RHO      | splicing variant              | yes | yes | correct               | causative variant     |
| c.1961G>T  | 157 | SNRNP200 | high pathogenicity prediction | yes | yes | n/a                   | not causative variant |
| c.3260C>T  | 157 | SNRNP200 | pathogenic                    | yes | yes | n/a                   | causative variant     |

**Supplementary Table S1.** Variant identification process in each patient analysed. Classification of all variants detected in each patient (**A**). Selection of variants likely involved in adIRD as determined by previous studies or by *in silico* predictors. Only those variants confirmed by Sanger were submitted to segregation analysis (**B**) (for selection criteria used see Supplementary Fig. S4). Asterisks indicate highly repetitive variants, found in several patients and therefore regarded as false positives.

# Supplementary Table S2

| PATIENT | AGE OF ONSET | SYMPTONS AT DIAGNOSIS | VISUAL ACUITY IN 2015 (LogMAR VA RE) | VISUAL ACUITY IN 2015 (LogMAR VA LE) | ESPHERICAL EQUIVALENT RE | ESPHERICAL EQUIVALENT LE | CATARACT (YES, NO, PF -PSEUDOPHAKIA, APHAKIA)RE | CATARACT (YES, NO, PF -PSEUDOPHAKIC, AFAQUIC)LE | IOP RE | IOP LE | PALE OPTIC DISC | ARTERIOLAR ATTENUATION | BONE SPICULE PIGMENT | SECTORIAL RP(YES/NO) | EPIRETINAL MEMBRANE (ERM) | MACULAR EDEMA | MACULAR THICKNESS RE(STRATUS OCT) | MACULAR THICKNESS LE(STRATUS OCT) | MACULAR THICKNESS RE(CIRRUS OCT) | MACULAR THICKNESS LE(CIRRUS OCT) | VISUAL FIELD DEGREES | ERG |
|---------|--------------|-----------------------|--------------------------------------|--------------------------------------|--------------------------|--------------------------|-------------------------------------------------|-------------------------------------------------|--------|--------|-----------------|------------------------|----------------------|----------------------|---------------------------|---------------|-----------------------------------|-----------------------------------|----------------------------------|----------------------------------|----------------------|-----|
| 2       | 6            | NYCTALOPIA            | 0.2                                  | 0.3                                  | -0.25                    | -0.5                     | YES                                             | YES                                             | 16     | 16     | YES             | YES                    | YES                  | NO                   | NO                        | YES           | 121                               | 119                               | 169                              | 165                              | 11                   | ND  |
| 16      | 43           | DECREASE VA           | 0.2                                  | 0.1                                  | 0                        | 0.125                    | PP                                              | PP                                              | 19     | 16     | YES             | YES                    | YES                  | NO                   | YES                       | YES           | 146                               | 230                               |                                  |                                  | 4                    | NA  |
| 19S     | 13           | ASYMPTOMATIC          | 0                                    | 0                                    | 0.5                      | 0.875                    | NO                                              | NO                                              | 13     | 14     | NO              | NO                     | YES                  | NO                   | NO                        | NO            |                                   |                                   | 266                              | 249                              | 18                   | NA  |
| 20      | 18           | DECREASE VA           | 1                                    | 0.5                                  | -5.25                    | -3.75                    | YES                                             | YES                                             | 15     | 15     | YES             | YES                    | YES                  | NO                   | NO                        | NO            |                                   |                                   |                                  |                                  | 4                    | ND  |
| 22      | 45           | NYCTALOPIA            | 0.5                                  | 0.8                                  | 1.625                    | 2.25                     | YES                                             | YES                                             | 15     | 17     | YES             | YES                    | YES                  | NO                   | NO                        | YES           | 114                               | 140                               |                                  |                                  |                      | ND  |
| 37      | 48           | DECREASE VA           | 4                                    | 0.3                                  | -5.375                   | -4.875                   | NO                                              | YES                                             | 14     | 14     | YES             | YES                    | YES                  | NO                   | NO                        | NO            | 148                               | 123                               |                                  |                                  | 0                    | ND  |
| 39      | 27           | DECREASE VA           | 0                                    | 0.2                                  |                          |                          | PP                                              | PP                                              | 16     | 16     | YES             | YES                    | YES                  | NO                   | NO                        | YES           | 244                               | 324                               |                                  |                                  | 8                    | ND  |
| 42      | 58           | DECREASE VA           | 2                                    | 1.3                                  |                          |                          | PP                                              | YES                                             | 16     | 16     | YES             | YES                    | YES                  | NO                   | NO                        | NO            | 218                               | 165                               |                                  |                                  | 9                    | ND  |
| 43      | 49           | VISUAL FIELD LOSS     | 0.2                                  | 0.5                                  | -0.25                    | 1.25                     | NO                                              | YES                                             | 17     | 18     | YES             | YES                    | YES                  | NO                   | YES                       | YES           | 258                               | 320                               |                                  |                                  |                      | ND  |
| 48      | 58           | NYCTALOPIA            | 0                                    | 0                                    | 0.625                    | -0.875                   | NO                                              | NO                                              | 14     | 14     | YES             | YES                    | YES                  | NO                   | NO                        | NO            | 225                               | 258                               | 322                              | 336                              | 15                   | ND  |
| 64      | 22           | VISUAL FIELD LOSS     | 0.1                                  | 0.3                                  | -1.5                     | -1.75                    | YES                                             | YES                                             | 12     | 12     | YES             | YES                    | YES                  | NO                   | YES                       | YES           | 328                               | 345                               |                                  |                                  | 10                   | ND  |
| 66      | 18           | VISUAL FIELD LOSS     | 0.05                                 | 0.05                                 | -11.125                  | -10.125                  | YES                                             | YES                                             | 12     | 14     | YES             | YES                    | YES                  | NO                   | NO                        | NO            | 171                               | 209                               |                                  |                                  | 10                   | ND  |
| 69      | 29           | NYCTALOPIA            | 0.18                                 | 0.2                                  | -0.125                   | -5.75                    | PP                                              | YES                                             | 14     | 14     | YES             | YES                    | YES                  | YES                  | NO                        | YES           | 191                               | 234                               |                                  |                                  | 5                    | ND  |
| 89      | 23           | NYCTALOPIA            | 0.5                                  | 0.18                                 | 0.125                    | -1                       | YES                                             | YES                                             | 10     | 10     | YES             | YES                    | YES                  | NO                   | NO                        | NO            | 121                               | 212                               |                                  |                                  | 11                   | ND  |
| 90      | 20           | NYCTALOPIA            | 1.3                                  | 1.3                                  | 13.25                    | 13.75                    | AP                                              | AP                                              | 8      | 8      | YES             | YES                    | YES                  | NO                   | YES                       | NO            | 119                               | 253                               |                                  |                                  |                      | ND  |
| 105     | 12           | NYCTALOPIA            | 3                                    | 2                                    | -1                       | 0.5                      | PP                                              | PP                                              | 16     | 16     | YES             | YES                    | YES                  | NO                   |                           |               |                                   |                                   |                                  |                                  |                      | ND  |
| 101     | 37           | NYCTALOPIA            | 0.3                                  | 0.3                                  | -2.5                     | -2                       | YES                                             | YES                                             | 14     | 14     | YES             | YES                    | YES                  | NO                   | NO                        | NO            | 226                               | 296                               | 312                              | 330                              | 15                   | ND  |
| 102     | 15           | NYCTALOPIA            | 0.05                                 | 0                                    | -5                       | -4.75                    | NO                                              | NO                                              | 13     | 15     | YES             | YES                    | YES                  | NO                   | NO                        | NO            |                                   |                                   | 286                              | 288                              |                      | ND  |
| 113     | 14           | NYCTALOPIA            | 0.18                                 | 0.18                                 |                          |                          | YES                                             | YES                                             | 14     | 14     | YES             | YES                    | YES                  | NO                   | YES                       | NO            |                                   |                                   | 260                              | 269                              | 5                    | ND  |
| 85      | 28           | DECREASE VA           | 1                                    | 0.4                                  | -8                       | -2.125                   | PP                                              | NO                                              | 14     | 14     | YES             | YES                    | YES                  | NO                   | NO                        | NO            |                                   |                                   | 279                              | 279                              |                      | NA  |
| 80      | 29           | DECREASE VA           | 0.2                                  | 0.5                                  |                          |                          | YES                                             | PP                                              | 18     | 18     | YES             | YES                    | YES                  | NO                   | SI                        | YES           |                                   |                                   |                                  |                                  |                      | NA  |
| 133     | 49           | VISUAL FIELD LOSS     | 0.1                                  | 0.05                                 | -0.5                     | -2.125                   | PP                                              | YES                                             | 16     | 16     | YES             | YES                    | YES                  | NO                   | NO                        | NO            |                                   |                                   | 269                              | 252                              | 12                   | ND  |
| 134     | 44           | DECREASE VA           | 0.2                                  | 0.4                                  | -0.25                    | -0.25                    | YES                                             | YES                                             | 18     | 18     | YES             | YES                    | YES                  | NO                   | YES                       | YES           |                                   |                                   | 287                              | 272                              | 10                   | ND  |
| 135     | 41           | NYCTALOPIA            | 0                                    | 0                                    | 0.75                     | -0.625                   | NO                                              | NO                                              | 14     | 14     | NO              | NO                     | YES                  | YES                  | NO                        | NO            |                                   |                                   | 267                              | 276                              | SS                   | ND  |
| 146     | 37           | NYCTALOPIA            | 0.05                                 | 0                                    | 0                        | 0.25                     | NO                                              | NO                                              | 17     | 15     | NO              | NO                     | YES                  | YES                  | NO                        | NO            |                                   |                                   | 281                              | 294                              | 12                   | ND  |
| 157     | 62           | VISUAL FIELD LOSS     | 0                                    | 0                                    | 1.5                      | -0.625                   | NO                                              | YES                                             | 15     | 18     | YES             | YES                    | YES                  | NO                   |                           |               |                                   |                                   |                                  |                                  | 5                    | ND  |
| 148     | 20           | NYCTALOPIA            | 0.8                                  | 0.8                                  | -0.25                    | -0.5                     | PP                                              | PP                                              | 16     | 15     | YES             | YES                    | YES                  | NO                   |                           |               |                                   |                                   |                                  |                                  |                      | NA  |
| 70      | 49           | PHOTOPHOBIA           | 0.00                                 | 0                                    | 0                        | 0.125                    | NO                                              | NO                                              | 14     | 14     | NO              | NO                     | NO                   | NO                   | NO                        | NO            |                                   |                                   |                                  |                                  | 20                   | NA  |
| 79      | 24           | NYCTALOPIA            | 0.3                                  | 0.3                                  | -1                       | 0.5                      | YES                                             | YES                                             | 13     | 15     | YES             | YES                    | YES                  | NO                   | NO                        | NO            |                                   |                                   |                                  |                                  |                      |     |

**Supplementary Table S2.** Clinical features of the patients analysed. Abbreviations; AP: aphakia; ERG: electroretinogram; IOP: intraocular pressure; LE: left eye; N: normal; NA: not available; ND: not detectable; PP: pseudophakia; RE: right eye; SS: superior scotoma.

## Supplementary Table S3

---

*AIPL1, BEST1, CA4, CRX, FSCN2, GUCA1A, GUCA1B, GUCY2D, IMPDH1, KLHL7, NR2E3, NRL, OTX2, PITPNM3, PROM1, PRPF3, PRPF31, PRPF6, PRPF8, PRPH2, RDH12, RHO, RIMS1, ROM1, RP1, RP9, RPE65, SEMA4A, SNRNP200, TOPORS, UNC119.*

---

**Supplementary Table S3.** List of genes analysed.
